# Supplementary material for: Effects of Maternal Dietary Patterns during Pregnancy on Early Childhood Growth Trajectories and Obesity Risk: The CANDLE Study
Source: PubMed Central journal article supplement (PMC7071328; doi:10.3390/nu12020465), 2020-02-13
Supplement: nutrients-12-00465-s001.pdf [file nutrients-12-00465-s001.pdf]

Supplemental Figure 1. BMI-z-score trajectories among the CANDLE children.

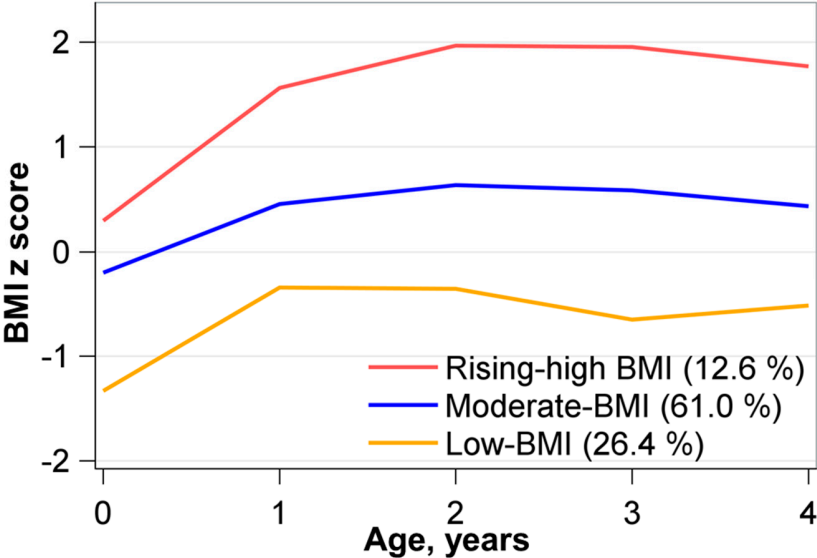

**Supplemental Figure 2. Early childhood energy intake trajectories among the children of black and white mothers.**

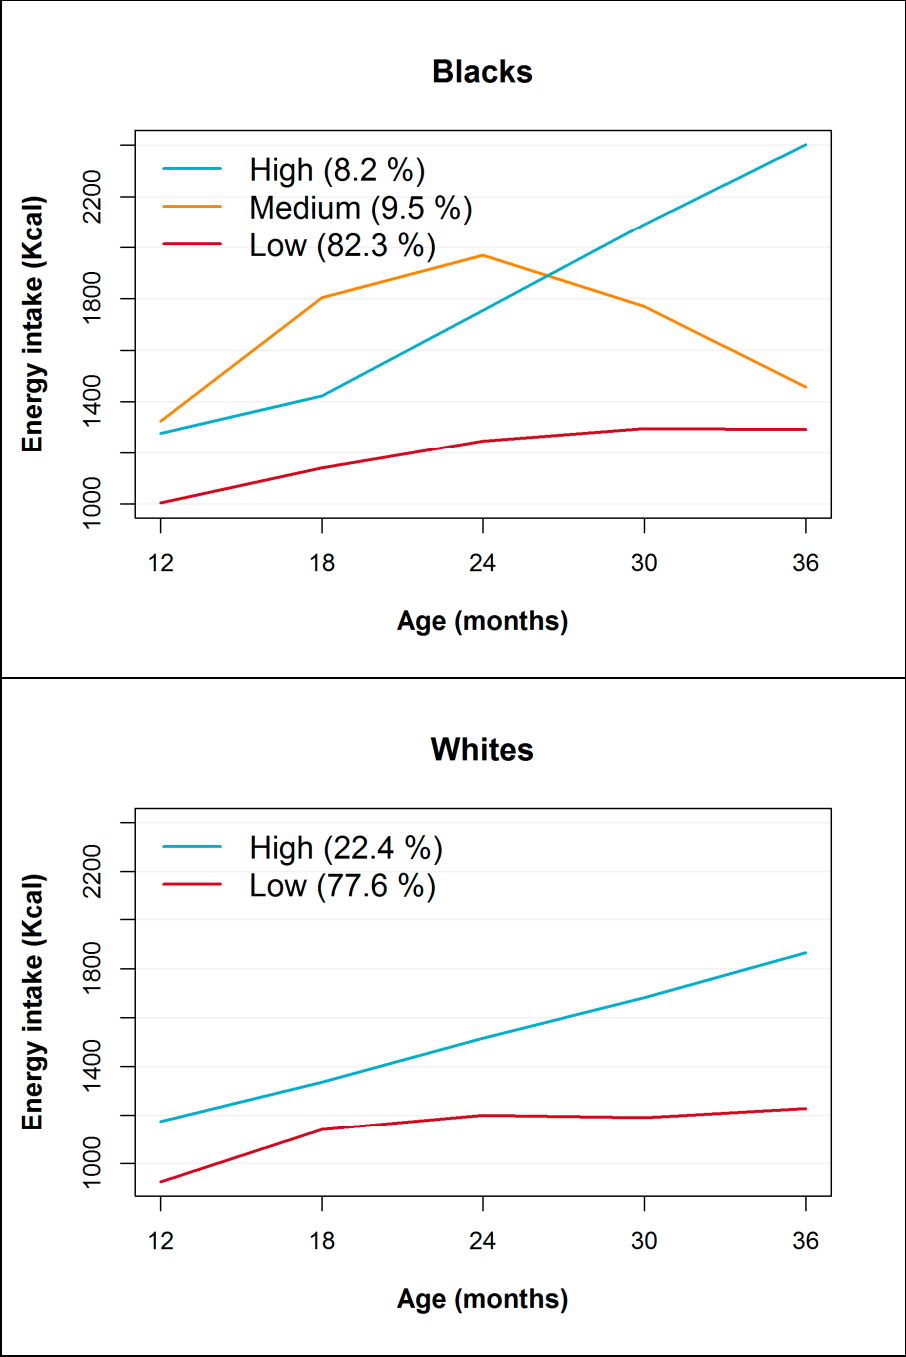

**Supplemental Table 1. Food items within each food group.**

| <b>Food groups</b>               | <b>Food items</b>                                                                                                                 |
|----------------------------------|-----------------------------------------------------------------------------------------------------------------------------------|
| Red meat                         | Beef, pork, ribs, veal, meat loaf, and hamburger (cheeseburger)                                                                   |
| Processed meat                   | Breakfast sausage, bacon, hot dogs, and lunch meats                                                                               |
| Organ meat                       | Liver, pig feet, and menudo                                                                                                       |
| Poultry                          | Roast chicken                                                                                                                     |
| Mixed meat                       | Tacos, other beef dishes, and other chicken dishes                                                                                |
| Fish and other seafood           | Oysters, shellfish, tuna, and other fish                                                                                          |
| Fried chicken and fish           | Fried chicken and fried fish                                                                                                      |
| Egg                              | Breakfast egg sandwich and other eggs                                                                                             |
| Dairy                            | Milk, milk on cereal, yogurt, cheese, ice cream, and Slim Fast                                                                    |
| Sugar-sweetened beverages        | Hi-C, drinks with some juice, iced tea, Kool-Aid, sports drinks, and soft drink                                                   |
| Fruit juices                     | Real orange juice and other real juice                                                                                            |
| Alcohol                          | Beer, wine, and liquor                                                                                                            |
| Tea and Coffee                   | Coffee and hot tea                                                                                                                |
| Water                            | Water                                                                                                                             |
| Fruit                            | Bananas, apples, pears, oranges, tangerines, grapefruits, peaches, cantaloupes, strawberries, watermelons, and other fresh fruits |
| Canned fruit                     | Canned fruit                                                                                                                      |
| Greens                           | Greens                                                                                                                            |
| Spinach                          | Spinach                                                                                                                           |
| Tomatoes                         | Tomatoes and tomato juice                                                                                                         |
| Yellow vegetables                | Carrots and sweet potato                                                                                                          |
| Potatoes                         | Potatoes                                                                                                                          |
| French fries                     | French fries                                                                                                                      |
| Other vegetables                 | Broccoli, corn, green beans, cole slaw, vegetable stew, vegetable soup, and other vegetables                                      |
| Legumes                          | Refried beans, bean soup, and other beans                                                                                         |
| Tofu and meat substitutes        | Tofu and meat substitutes                                                                                                         |
| Mayonnaise, margarine and butter | Margarine, butter and mayonnaise                                                                                                  |
| Salad dressing                   | Green salad and salad dressing                                                                                                    |
| Condiments                       | Jelly, catsup, and mustard                                                                                                        |
| Whole grains                     | Cooked cereal                                                                                                                     |
| Cold breakfast cereal            | Cold cereal                                                                                                                       |
| Bread products                   | Pancakes, biscuits, burger rolls, bagels, tortillas (flour), corn bread, and white bread                                          |
| Pizza                            | Pizza                                                                                                                             |
| Rice, pasta, mixed and dishes    | Spaghetti with meat sauce, macaroni and cheese, rice, other soup, and other noodles                                               |
| Nuts                             | Nuts and peanut butter                                                                                                            |
| Sweets and desserts              | Donuts, cakes, cookies, chocolate syrup, pumpkin pie, chocolate candy, other pie, and other candy                                 |
| Snacks                           | Power bars, breakfast bars, chips, and crackers                                                                                   |

**Supplemental Table 2. Mothers' eating frequencies of food groups in a month according to quartiles of the fast food pattern score.**

| <b>Food group</b>                | <b>Q1</b>   | <b>Q2</b>   | <b>Q3</b>   | <b>Q4</b>   | <b>P value<sup>a</sup></b> |
|----------------------------------|-------------|-------------|-------------|-------------|----------------------------|
| Red meat                         | 13.2 ± 14.0 | 9.5 ± 9.0   | 10.1 ± 8.7  | 14.7 ± 13.5 | 0.08                       |
| Processed meat                   | 22.7 ± 19.7 | 17.0 ± 15.8 | 18.5 ± 16.2 | 24.8 ± 18.5 | 0.08                       |
| Organ meats                      | 0.9 ± 3.2   | 0.5 ± 1.4   | 0.4 ± 1.3   | 1.0 ± 2.4   | 0.79                       |
| Poultry                          | 4.6 ± 6.1   | 3.6 ± 4.1   | 3.9 ± 5.4   | 4.1 ± 5.1   | 0.35                       |
| Mixed meat                       | 7.5 ± 8.8   | 5.4 ± 4.6   | 6.4 ± 6.4   | 7.3 ± 8.1   | 0.75                       |
| Fish and other seafood           | 3.4 ± 4.2   | 3.3 ± 3.9   | 3.1 ± 3.6   | 4.4 ± 6.2   | 0.02                       |
| Fried chicken and fish           | 6.1 ± 7.6   | 4.7 ± 5.7   | 6.2 ± 6.7   | 13.1 ± 10.6 | < 0.001                    |
| Egg                              | 10.0 ± 11.5 | 8.9 ± 9.7   | 9.9 ± 10.0  | 13.9 ± 12.6 | < 0.001                    |
| Dairy                            | 59.7 ± 28.2 | 52.8 ± 25.4 | 49.6 ± 24.6 | 54.1 ± 27.0 | 0.002                      |
| Sugar-sweetened beverages        | 32.5 ± 26.7 | 25.2 ± 19.6 | 27.6 ± 20.9 | 41.1 ± 28.7 | < 0.001                    |
| Fruit juices                     | 17.3 ± 15.9 | 16.8 ± 14.0 | 19.4 ± 15.0 | 25.1 ± 18.3 | < 0.001                    |
| Alcohol                          | 0.3 ± 1.6   | 0.1 ± 0.5   | 0.0 ± 0.3   | 0.0 ± 0.2   | < 0.001                    |
| Tea and coffee                   | 8.2 ± 13.1  | 4.5 ± 9.5   | 2.2 ± 6.1   | 1.5 ± 4.7   | < 0.001                    |
| Water                            | 24.9 ± 9.3  | 26.1 ± 8.5  | 27.8 ± 6.4  | 27.6 ± 6.9  | < 0.001                    |
| Fruit                            | 47.1 ± 35.3 | 39.3 ± 28.5 | 40.1 ± 29.4 | 51.8 ± 37.0 | 0.07                       |
| Canned fruit                     | 6.4 ± 8.9   | 5.0 ± 7.0   | 5.9 ± 8.0   | 9.4 ± 9.8   | < 0.001                    |
| Greens                           | 2.6 ± 4.7   | 1.9 ± 4.0   | 2.3 ± 4.2   | 3.4 ± 5.2   | 0.008                      |
| Spinach                          | 1.7 ± 3.9   | 1.6 ± 3.9   | 1.4 ± 3.2   | 2.1 ± 4.8   | 0.31                       |
| Tomatoes                         | 6.1 ± 9.3   | 6.2 ± 8.2   | 5.7 ± 8.3   | 7.7 ± 9.8   | 0.046                      |
| Yellow vegetables                | 9.1 ± 10.5  | 5.4 ± 6.3   | 4.4 ± 5.2   | 4.2 ± 5.6   | < 0.001                    |
| Potatoes                         | 6.1 ± 6.6   | 4.6 ± 4.4   | 5.0 ± 5.7   | 6.7 ± 6.9   | 0.16                       |
| French fries                     | 9.7 ± 9.3   | 7.1 ± 7.4   | 7.1 ± 7.4   | 10.2 ± 9.1  | 0.46                       |
| Other vegetables                 | 23.6 ± 20.9 | 21.0 ± 16.6 | 21.1 ± 16.0 | 28.5 ± 22.7 | 0.002                      |
| Legumes                          | 5.1 ± 8.0   | 3.6 ± 4.3   | 3.1 ± 3.6   | 3.6 ± 5.6   | < 0.001                    |
| Tofu and meat substitutes        | 1.0 ± 3.7   | 0.5 ± 1.9   | 0.3 ± 1.5   | 0.3 ± 2.1   | < 0.001                    |
| Mayonnaise, margarine and butter | 17.8 ± 15.8 | 15.7 ± 14.6 | 17.2 ± 16.1 | 23.6 ± 18.7 | < 0.001                    |
| Salad dressing                   | 16.8 ± 15.6 | 15.0 ± 13.8 | 15.9 ± 15.7 | 19.6 ± 16.6 | 0.02                       |
| Condiments                       | 20.7 ± 16.6 | 16.2 ± 13.4 | 18.3 ± 16.0 | 23.4 ± 18.6 | 0.01                       |
| Whole grains                     | 7.5 ± 9.8   | 5.1 ± 7.1   | 4.6 ± 7.1   | 5.5 ± 8.4   | 0.002                      |
| Cold breakfast cereal            | 17.4 ± 10.9 | 14.8 ± 10.1 | 11.8 ± 10.2 | 12.4 ± 10.7 | < 0.001                    |
| Bread products                   | 42.3 ± 26.8 | 32.7 ± 20.3 | 32.2 ± 23.2 | 39.3 ± 23.0 | 0.11                       |
| Pizza                            | 5.8 ± 6.9   | 3.8 ± 4.3   | 3.7 ± 4.5   | 4.3 ± 4.9   | < 0.001                    |
| Rice, pasta, mixed, dishes       | 22.6 ± 17.3 | 14.5 ± 10.3 | 14.1 ± 12.0 | 16.4 ± 13.3 | < 0.001                    |
| Nuts                             | 9.9 ± 11.0  | 7.7 ± 8.8   | 5.8 ± 7.8   | 6.1 ± 9.2   | < 0.001                    |
| Sweets and desserts              | 31.4 ± 30.3 | 19.5 ± 22.2 | 18.0 ± 19.4 | 22.2 ± 24.0 | < 0.001                    |
| Snacks                           | 29.8 ± 19.5 | 21.9 ± 16.1 | 19.1 ± 16.8 | 21.1 ± 16.5 | < 0.001                    |

<sup>a</sup>. For trend tests.

**Supplemental Table 3. Mothers' eating frequencies of food groups in a month according to quartiles of the processed food pattern score.**

| <b>Food group</b>                | <b>Q1</b>   | <b>Q2</b>   | <b>Q3</b>   | <b>Q4</b>   | <b>P value<sup>a</sup></b> |
|----------------------------------|-------------|-------------|-------------|-------------|----------------------------|
| Red meat                         | 13.5 ± 14.4 | 9.8 ± 8.4   | 10.8 ± 10.2 | 13.5 ± 12.6 | 0.78                       |
| Processed meat                   | 19.3 ± 17.7 | 16.5 ± 14.9 | 18.2 ± 14.0 | 29.1 ± 21.3 | < 0.001                    |
| Organ meat                       | 1.5 ± 3.7   | 0.4 ± 1.1   | 0.3 ± 0.8   | 0.6 ± 1.9   | < 0.001                    |
| Poultry                          | 3.9 ± 5.4   | 3.9 ± 5.3   | 4.2 ± 5.3   | 4.0 ± 4.8   | 0.64                       |
| Mixed meat                       | 7.4 ± 8.5   | 6.3 ± 6.5   | 5.8 ± 5.3   | 7.0 ± 7.9   | 0.31                       |
| Fish and other seafood           | 4.7 ± 6.2   | 3.6 ± 3.9   | 3.0 ± 4.1   | 2.9 ± 3.5   | < 0.001                    |
| Fried chicken and fish           | 9.4 ± 10.7  | 7.0 ± 7.7   | 5.5 ± 5.8   | 8.4 ± 8.7   | 0.03                       |
| Egg                              | 9.9 ± 11.9  | 9.2 ± 9.9   | 9.4 ± 9.3   | 14.3 ± 12.6 | < 0.001                    |
| Dairy                            | 44.8 ± 25.0 | 47.1 ± 22.0 | 56.6 ± 25.8 | 67.8 ± 26.8 | < 0.001                    |
| Sugar-sweetened beverages        | 43.6 ± 28.6 | 28.6 ± 23.5 | 26.4 ± 20.4 | 27.8 ± 23.1 | < 0.001                    |
| Fruit juices                     | 18.8 ± 16.4 | 17.6 ± 15.5 | 18.4 ± 14.8 | 23.8 ± 17.4 | < 0.001                    |
| Alcohol                          | 0.2 ± 1.4   | 0.1 ± 0.7   | 0.1 ± 0.6   | 0.1 ± 0.5   | 0.04                       |
| Tea and Coffee                   | 6.4 ± 11.9  | 4.9 ± 10.0  | 3.2 ± 7.7   | 1.9 ± 6.1   | < 0.001                    |
| Water                            | 25.4 ± 9.1  | 26.2 ± 8.3  | 27.0 ± 7.6  | 27.8 ± 6.6  | < 0.001                    |
| Fruit                            | 51.1 ± 35.6 | 42.5 ± 31.3 | 38.8 ± 28.7 | 45.9 ± 35.2 | 0.02                       |
| Canned fruit                     | 5.1 ± 7.4   | 5.0 ± 7.0   | 6.2 ± 7.9   | 10.4 ± 10.7 | < 0.001                    |
| Greens                           | 2.8 ± 4.8   | 1.9 ± 3.9   | 1.9 ± 3.3   | 3.7 ± 5.7   | 0.04                       |
| Spinach                          | 1.3 ± 3.2   | 1.4 ± 3.1   | 1.4 ± 3.5   | 2.5 ± 5.6   | < 0.001                    |
| Tomatoes                         | 6.4 ± 9.7   | 5.5 ± 7.5   | 5.8 ± 7.6   | 8.0 ± 10.5  | 0.023                      |
| Yellow vegetables                | 5.4 ± 7.5   | 5.3 ± 6.7   | 4.7 ± 5.9   | 7.7 ± 9.0   | < 0.001                    |
| Potatoes                         | 6.0 ± 6.0   | 4.5 ± 5.1   | 5.1 ± 5.4   | 6.9 ± 7.3   | 0.03                       |
| French fries                     | 8.3 ± 8.4   | 6.7 ± 6.6   | 7.7 ± 7.3   | 11.3 ± 10.3 | < 0.001                    |
| Other vegetables                 | 22.7 ± 18.0 | 20.9 ± 17.0 | 20.3 ± 16.0 | 30.3 ± 24.3 | < 0.001                    |
| Legumes                          | 5.6 ± 7.8   | 3.4 ± 4.4   | 3.1 ± 3.6   | 3.2 ± 5.7   | < 0.001                    |
| Tofu and meat substitutes        | 0.5 ± 1.8   | 0.6 ± 2.6   | 0.5 ± 1.9   | 0.5 ± 3.3   | 1.00                       |
| Mayonnaise, margarine and butter | 18.6 ± 17.9 | 16.3 ± 14.5 | 16.9 ± 15.2 | 22.6 ± 17.9 | 0.002                      |
| Salad dressing                   | 12.2 ± 13.0 | 13.6 ± 12.9 | 16.7 ± 13.5 | 24.7 ± 18.9 | < 0.001                    |
| Condiments                       | 22.5 ± 19.1 | 18.2 ± 14.4 | 18.5 ± 15.3 | 19.6 ± 16.4 | 0.03                       |
| Whole grains                     | 4.4 ± 7.5   | 4.8 ± 7.0   | 5.4 ± 7.6   | 8.2 ± 10.0  | < 0.001                    |
| Cold breakfast cereal            | 11.5 ± 10.5 | 12.5 ± 10.0 | 14.7 ± 10.4 | 17.7 ± 11.0 | < 0.001                    |
| Bread products                   | 41.6 ± 28.8 | 33.0 ± 20.9 | 32.6 ± 20.1 | 39.3 ± 23.1 | 0.23                       |
| Pizza                            | 4.5 ± 5.5   | 4.2 ± 4.9   | 4.0 ± 4.6   | 4.9 ± 6.0   | 0.55                       |
| Rice, pasta, mixed and dishes    | 18.4 ± 15.2 | 15.7 ± 12.7 | 15.1 ± 12.2 | 18.5 ± 14.9 | 0.87                       |
| Nuts                             | 8.5 ± 10.2  | 7.0 ± 9.0   | 6.8 ± 8.6   | 7.2 ± 9.6   | 0.09                       |
| Sweets and desserts              | 29.2 ± 31.1 | 20.9 ± 20.9 | 19.7 ± 21.2 | 21.3 ± 23.6 | < 0.001                    |
| Snacks                           | 26.0 ± 19.2 | 20.8 ± 15.6 | 20.6 ± 15.6 | 24.4 ± 19.6 | 0.24                       |

<sup>a</sup>. For trend tests.

**Supplemental Table 4. Mediation analysis of potential mediators for the associations between the maternal fast food pattern and the childhood rising-high-BMI trajectory and overweight/obesity risk at age 4<sup>a</sup>**

| <b>Mediator</b>                    | <b>Rising-high-BMI trajectory</b> |                       | <b>Overweight/obesity at age 4</b> |                       |
|------------------------------------|-----------------------------------|-----------------------|------------------------------------|-----------------------|
|                                    | <b>Mediation effect</b>           | <b><i>P</i> value</b> | <b>Mediation effect</b>            | <b><i>P</i> value</b> |
| Gestational diabetes               | 0.0000                            | 0.93                  | -0.0001                            | 1.00                  |
| Gestational age at birth           | -0.0007                           | 0.42                  | -0.0023                            | 0.09                  |
| Birthweight                        | -0.0015                           | 0.50                  | -0.0013                            | 0.61                  |
| Breastfed status                   | -0.0004                           | 0.62                  | -0.0007                            | 0.60                  |
| Childhood energy intake trajectory | 0.0003                            | 0.76                  | -0.0004                            | 0.80                  |

<sup>a</sup> Adjusted for processed dietary pattern score, maternal age, education, insurance type, marital status, total energy intake, alcohol intake, smoking during pregnancy, parity, and child sex.

**Supplemental Table 5. Selected nutrient intakes (per 1000 kcal) according to quartiles of the fast food pattern score.**

| <b>Nutrients</b>        | <b>Q1</b>       | <b>Q2</b>       | <b>Q3</b>       | <b>Q4</b>       | <b>P value<sup>a</sup></b> |
|-------------------------|-----------------|-----------------|-----------------|-----------------|----------------------------|
| Protein, g              | 36.4 ± 6.0      | 37.3 ± 6.2      | 37.8 ± 6.4      | 37.6 ± 6.3      | 0.013                      |
| Fat, g                  | 39.8 ± 5.0      | 40.2 ± 5.8      | 40.5 ± 5.8      | 41.5 ± 5.8      | < 0.001                    |
| Carbohydrate, g         | 128.8 ± 14.3    | 127.4 ± 16.6    | 125.8 ± 16.3    | 123.4 ± 17.4    | < 0.001                    |
| Total sugar, g          | 59.3 ± 14.9     | 61.5 ± 15.9     | 63.7 ± 17.7     | 65.9 ± 18.2     | < 0.001                    |
| Fiber, g                | 9.5 ± 3.3       | 9.4 ± 2.9       | 8.9 ± 3.0       | 8.0 ± 2.5       | < 0.001                    |
| Cholesterol, mg         | 122.8 ± 42.4    | 133.2 ± 51.6    | 140.2 ± 46.6    | 155.2 ± 60.3    | < 0.001                    |
| Vitamin A, RAE          | 436.5 ± 171.9   | 435.8 ± 162.2   | 407.6 ± 153.9   | 396.4 ± 165.0   | < 0.001                    |
| Vitamin C, mg           | 63.4 ± 25.7     | 68.3 ± 29.4     | 76.4 ± 31.0     | 80.7 ± 34.6     | < 0.001                    |
| Vitamin D, IU           | 75.0 ± 44.0     | 86.5 ± 58.4     | 79.0 ± 55.3     | 69.7 ± 40.5     | 0.06                       |
| Vitamin E, mg           | 3.9 ± 1.1       | 3.9 ± 1.2       | 3.8 ± 1.1       | 3.7 ± 0.9       | 0.009                      |
| Vitamin K, µg           | 93.0 ± 67.9     | 97.4 ± 66.6     | 101.7 ± 79.5    | 104.5 ± 79.5    | 0.037                      |
| Beta-cryptoxanthin, µg  | 91.3 ± 58.7     | 109.3 ± 67.6    | 110.7 ± 70.4    | 113.3 ± 70.3    | < 0.001                    |
| Lutein-zeaxanthin, µg   | 1673.8 ± 1312.8 | 1753.9 ± 1219.3 | 1826.2 ± 1503.1 | 1876.6 ± 1487.6 | 0.05                       |
| Lycopene, µg            | 2681.3 ± 1756.7 | 2665.8 ± 1997.1 | 2591.1 ± 1712.5 | 2393.2 ± 1778.6 | 0.04                       |
| Potassium, mg           | 1301.0 ± 286.2  | 1357.7 ± 295.8  | 1356.1 ± 281.2  | 1308.0 ± 296.9  | 0.8                        |
| Fe, mg                  | 8.0 ± 1.8       | 7.7 ± 1.9       | 7.2 ± 1.7       | 6.8 ± 1.2       | < 0.001                    |
| Zn (animal sources), mg | 2.7 ± 0.8       | 2.8 ± 0.9       | 3.0 ± 0.8       | 3.1 ± 1.4       | < 0.001                    |
| Magnesium, mg           | 145.7 ± 37.4    | 148.3 ± 34.9    | 144.8 ± 35.9    | 132.5 ± 30.8    | < 0.001                    |
| Total choline, mg       | 140.7 ± 31.4    | 148.7 ± 35.0    | 149.7 ± 33.0    | 152.1 ± 40.0    | < 0.001                    |
| Folate equivalents, µg  | 305.0 ± 91.2    | 297.1 ± 101.3   | 274.9 ± 95.2    | 256.9 ± 74.5    | < 0.001                    |
| Folic acid, µg          | 103.3 ± 47.4    | 94.2 ± 52.7     | 80.6 ± 41.7     | 72.8 ± 31.6     | < 0.001                    |

IU, international unit. RAE, retinol activity equivalent.

<sup>a</sup>. For trend tests.
